# Supplementary material for: Preparation and characterization of NiW supported on Al-modified MCM-48 catalyst and its high hydrodenitrogenation activity and stability
Source: Royal Society of Chemistry journal article supplement (doi:10.1039/c6ra08955k), 2016-01-01
Supplement: c6ra08955k1.pdf [file c6ra08955k1.pdf]

## Electronic Supporting Information

### **Preparation and characterization of NiW supported on Al-modified MCM-48 catalyst and its high hydrodenitrogenation activity and stability**

Author: Mingqiang Shao<sup>a,b</sup>, Haitao Cui<sup>a\*</sup>, Shaoqing Guo<sup>c</sup>, Liangfu Zhao<sup>a</sup>, Yisheng Tan<sup>a</sup>

*a Institute of Coal Chemistry, Chinese Academy of Sciences, Taiyuan 030001, People's Republic of China*

*b Graduate University of the Chinese Academy of Sciences, Beijing 100039, People's Republic of China*

*c Taiyuan University of Science and Technology, Taiyuan 030024, People's Republic of China*

\* Corresponding authors. Fax: +86 0351 2021169.

*E-mail address: [cuiht@sxicc.ac.cn](mailto:cuiht@sxicc.ac.cn) (Haitao Cui)*

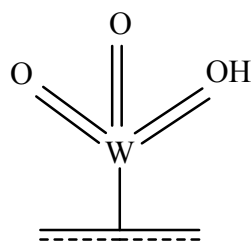

Scheme S1. Surface structure of W atom in oxidic state<sup>1</sup>

Table S1. NH<sub>3</sub>-TPD results of MCM-48, Al<sub>γ</sub>-MCM-48 (γ=200, 100, 50, 25) samples.

| Sample                    | mmol/g |
|---------------------------|--------|
| MCM-48                    | 0.156  |
| Al <sub>200</sub> -MCM-48 | 0.142  |
| Al <sub>100</sub> -MCM-48 | 0.144  |
| Al <sub>50</sub> -MCM-48  | 0.196  |
| Al <sub>25</sub> -MCM-48  | 0.235  |

Table S2. Py-IR results of NiW/MCM-48, NiW/Al<sub>γ</sub>-MCM-48 (γ=200, 100, 50, 25) and NiW/γ-Al<sub>2</sub>O<sub>3</sub> oxide precursors.

| Sample                               | Brønsted acidity (μmol/g) |       |       | Lewis acidity (μmol/g) |       |       |
|--------------------------------------|---------------------------|-------|-------|------------------------|-------|-------|
|                                      | 100°C                     | 200°C | 300°C | 100°C                  | 200°C | 300°C |
| NiW/MCM-48                           | 33                        | 32    | 27    | 412                    | 354   | 313   |
| NiW/Al <sub>200</sub> -MCM-48        | 46                        | 43    | 41    | 405                    | 371   | 311   |
| NiW/Al <sub>100</sub> -MCM-48        | 48                        | 45    | 34    | 413                    | 359   | 321   |
| NiW/Al <sub>50</sub> -MCM-48         | 55                        | 50    | 46    | 403                    | 359   | 310   |
| NiW/Al <sub>25</sub> -MCM-48         | 95                        | 91    | 85    | 389                    | 320   | 313   |
| NiW/γ-Al <sub>2</sub> O <sub>3</sub> | 19                        | 15    | 13    | 335                    | 243   | 204   |

**Table S3.**

Py-IR results of NiW/MCM-48, NiW/Al<sub>Y</sub>-MCM-48 (Y=200, 100, 50, 25) and NiW/ $\gamma$ -Al<sub>2</sub>O<sub>3</sub> sulfide catalysts.

| Sample                                        | Brønsted acidity ( $\mu\text{mol/g}$ ) |       |       | Lewis acidity ( $\mu\text{mol/g}$ ) |       |       |
|-----------------------------------------------|----------------------------------------|-------|-------|-------------------------------------|-------|-------|
|                                               | 100°C                                  | 200°C | 300°C | 100°C                               | 200°C | 300°C |
| NiW/MCM-48                                    | 26                                     | 25    | 21    | 336                                 | 271   | 237   |
| NiW/Al <sub>200</sub> -MCM-48                 | 39                                     | 31    | 29    | 329                                 | 287   | 242   |
| NiW/Al <sub>100</sub> -MCM-48                 | 41                                     | 37    | 33    | 341                                 | 287   | 253   |
| NiW/Al <sub>50</sub> -MCM-48                  | 49                                     | 44    | 39    | 336                                 | 286   | 232   |
| NiW/Al <sub>25</sub> -MCM-48                  | 85                                     | 80    | 72    | 304                                 | 249   | 233   |
| NiW/ $\gamma$ -Al <sub>2</sub> O <sub>3</sub> | 17                                     | 13    | 10    | 259                                 | 175   | 123   |

**Table S4.**

Metal fractions and Ni/W atomic ratio measured by XPS for nickel and tungsten species present on the surface of sulfided NiW/MCM-48, NiW/Al<sub>Y</sub>-MCM-48 (Y=200, 100, 50, 25) and NiW/ $\gamma$ -Al<sub>2</sub>O<sub>3</sub> catalysts.

| Sample                                        | NiS <sup>a</sup> | NiWS | Ni <sup>2+</sup> | WS <sub>2</sub> | WO <sub>x</sub> S <sub>y</sub> | W <sup>6+</sup> | R <sub>Ni/W</sub> <sup>b</sup> | [NiWS]( $\cdot 10^{-4}\text{mol}$ ) |
|-----------------------------------------------|------------------|------|------------------|-----------------|--------------------------------|-----------------|--------------------------------|-------------------------------------|
| NiW/MCM-48                                    | 18.8             | 34.9 | 46.3             | 72.5            | 8.6                            | 18.9            | 0.39                           | 0.31                                |
| NiW/Al <sub>200</sub> -MCM-48                 | 19.4             | 36.4 | 44.2             | 61.2            | 10.4                           | 28.4            | 0.40                           | 0.50                                |
| NiW/Al <sub>100</sub> -MCM-48                 | 21.4             | 40.4 | 38.2             | 58.2            | 12.2                           | 29.6            | 0.40                           | 0.61                                |
| NiW/Al <sub>50</sub> -MCM-48                  | 21.1             | 41.8 | 37.1             | 53.0            | 13.3                           | 33.7            | 0.41                           | 0.76                                |
| NiW/Al <sub>25</sub> -MCM-48                  | 23.8             | 42.4 | 33.8             | 50.2            | 9.9                            | 39.8            | 0.42                           | 0.89                                |
| NiW/ $\gamma$ -Al <sub>2</sub> O <sub>3</sub> | 12.1             | 23.7 | 64.2             | 31.2            | 16.1                           | 52.7            | 0.41                           | 0.49                                |

**a** relative amount calculated from XPS results (Eq. (4)).

**b** Ni/W ratio present on the supports surface calculated from XPS results (Eq. (5)).

**Table S5.** The HDN<sub>C</sub> of quinoline on NiW/MCM-48, NiW/Al<sub>γ</sub>-MCM-48 (Y=200, 100, 50, 25) and NiW/γ-Al<sub>2</sub>O<sub>3</sub> oxide precursors.

| Sample                               | HDN <sub>C</sub> (%) |        |        |
|--------------------------------------|----------------------|--------|--------|
|                                      | 300 °C               | 330 °C | 360 °C |
| NiW/MCM-48                           | 0                    | 0.6    | 8.9    |
| NiW/Al <sub>200</sub> -MCM-48        | 0                    | 0.5    | 7.6    |
| NiW/Al <sub>100</sub> -MCM-48        | 0                    | 0.2    | 5.6    |
| NiW/Al <sub>50</sub> -MCM-48         | 0                    | 0.2    | 6.1    |
| NiW/Al <sub>25</sub> -MCM-48         | 0                    | 0.3    | 5.8    |
| NiW/γ-Al <sub>2</sub> O <sub>3</sub> | 0                    | 0.2    | 2.3    |

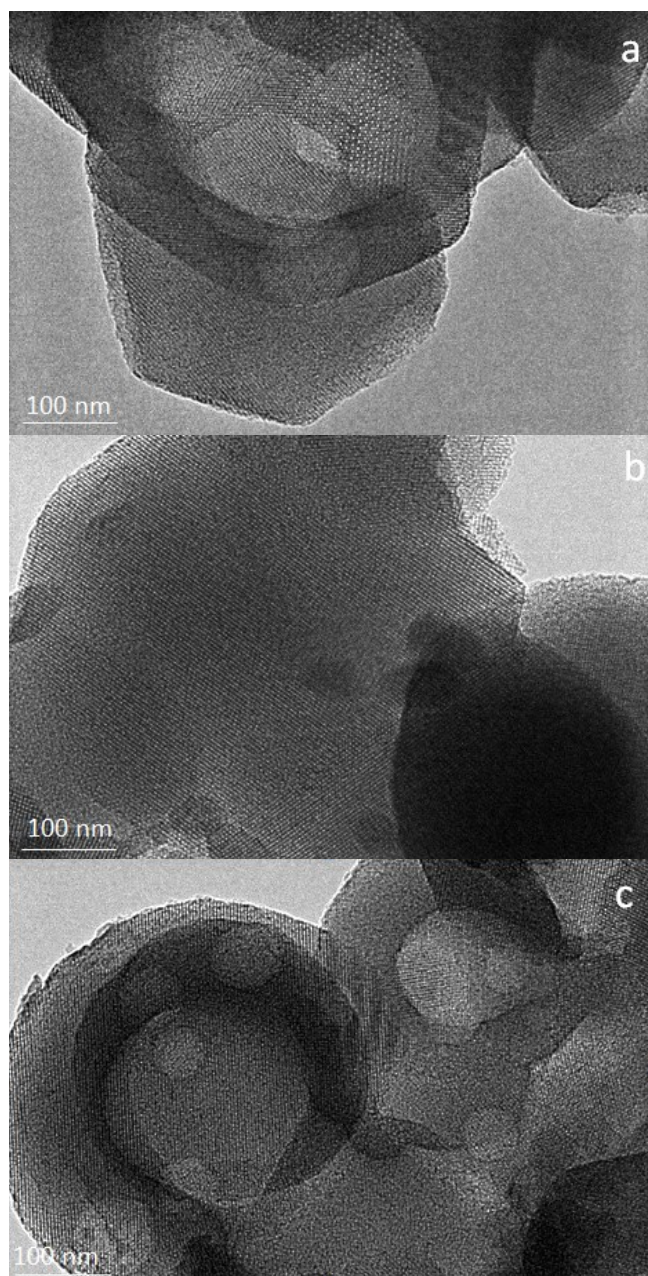

**Fig. S1.** HRTEM micrographs of (a) aluminum free MCM-48, (b) Al<sub>100</sub>-MCM-48 and (c) Al<sub>25</sub>-MCM-48.

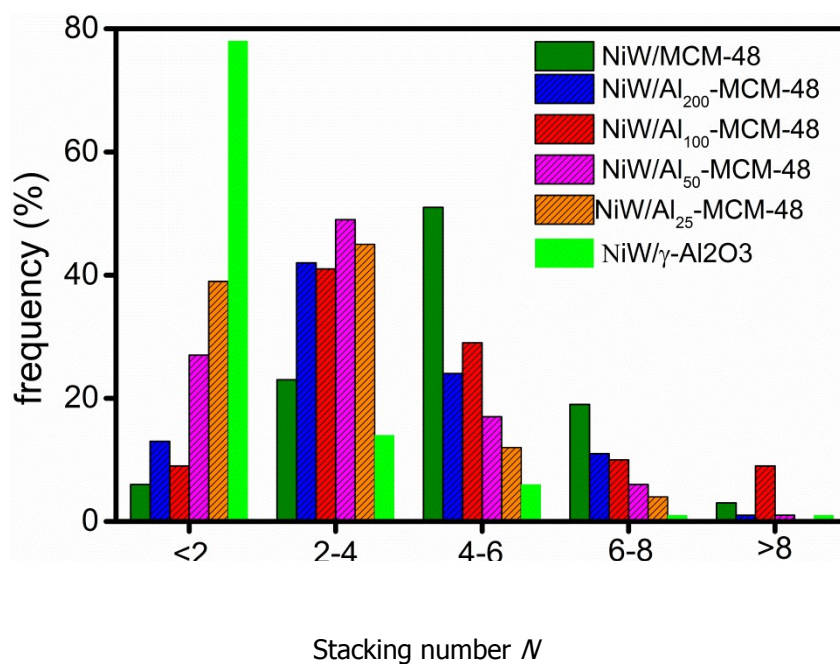

**Fig. S2a.** Distributions of stacking number of WS<sub>2</sub> slabs of NiW/MCM-48, NiW/Al<sub>Y</sub>-MCM-48 (Y=200, 100, 50, 25) and NiW/ $\gamma$ -Al<sub>2</sub>O<sub>3</sub> sulfide catalysts in sulfided states.

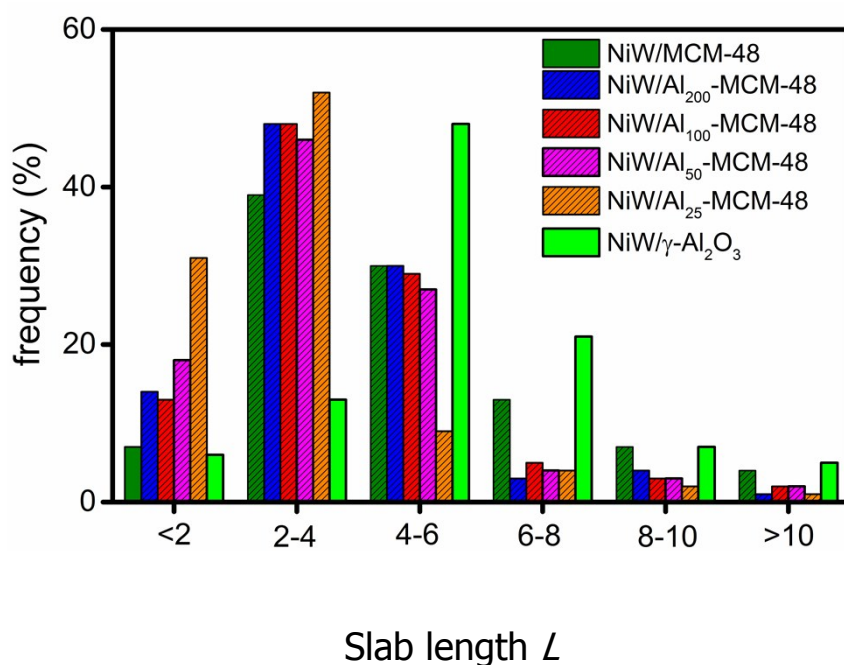

**Fig. S2b.** Distributions of slab length of WS<sub>2</sub> slabs of NiW/MCM-48, NiW/Al<sub>Y</sub>-MCM-48 (Y=200, 100, 50, 25) and NiW/ $\gamma$ -Al<sub>2</sub>O<sub>3</sub> sulfide catalysts in sulfided states.

1. J. Bernholc, J. A. Horsley, L. L. Murrell, L. G. Sherman and S. Soled, *J. Phys. Chem. B*, 1987, **91**, 1526-1530.
